# Supplementary material
Source: publisher figshare collection journal article supplement (https://sage.figshare.com/ndownloader/files/12370307)

## Cell culture tests in static condition

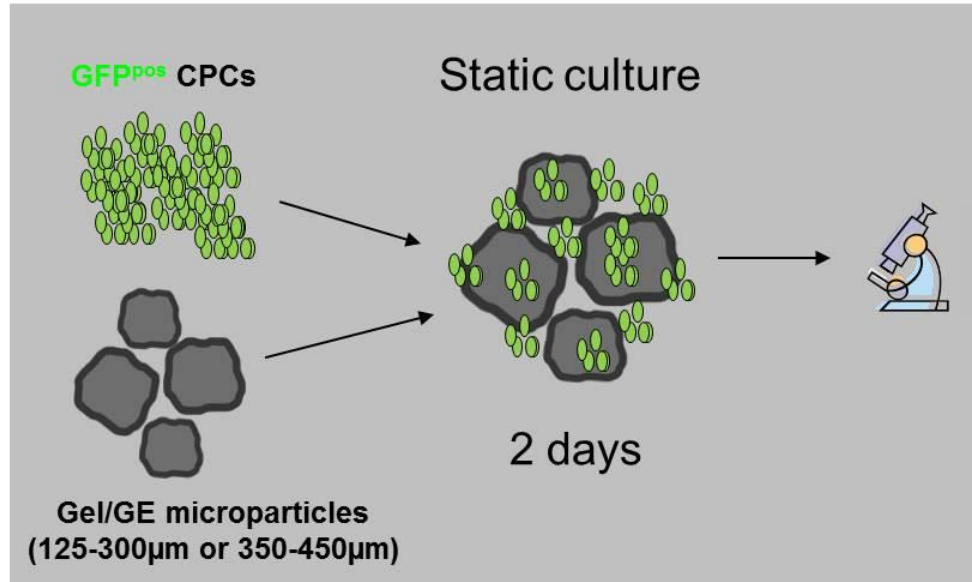

## Cell culture tests in dynamic suspension condition

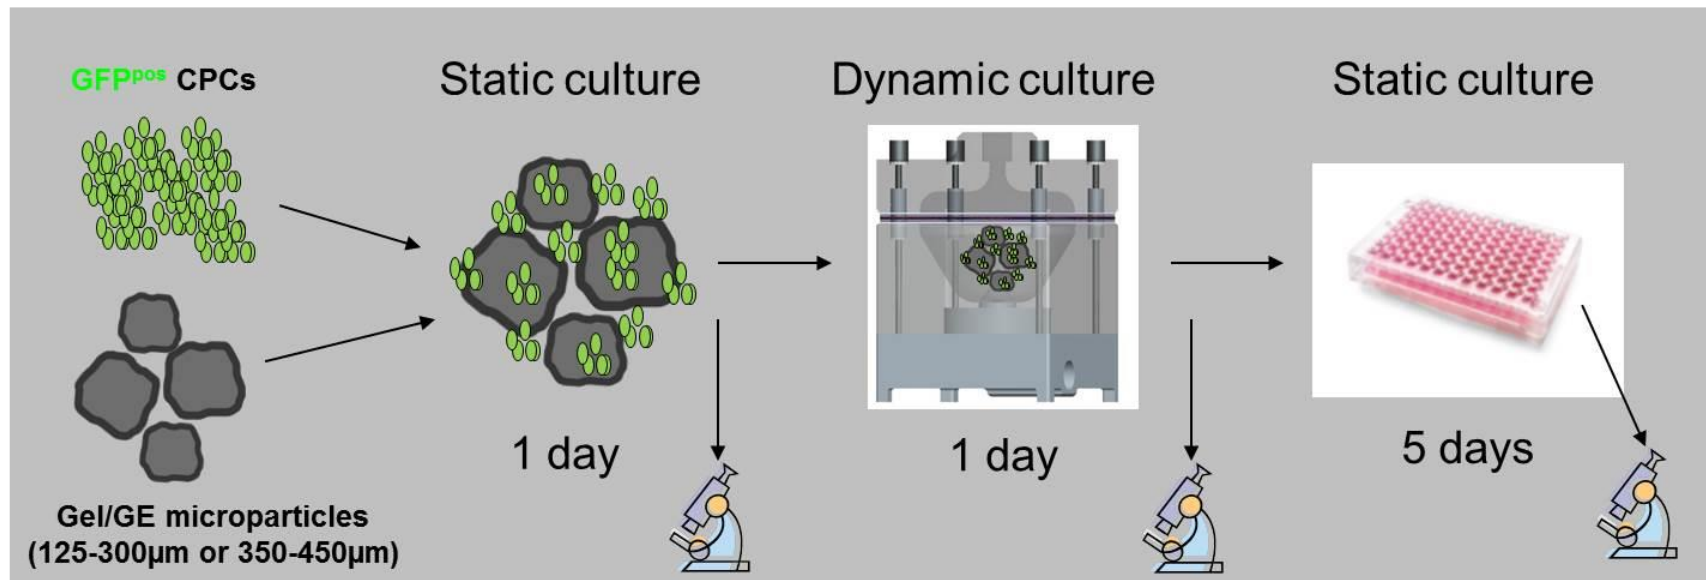

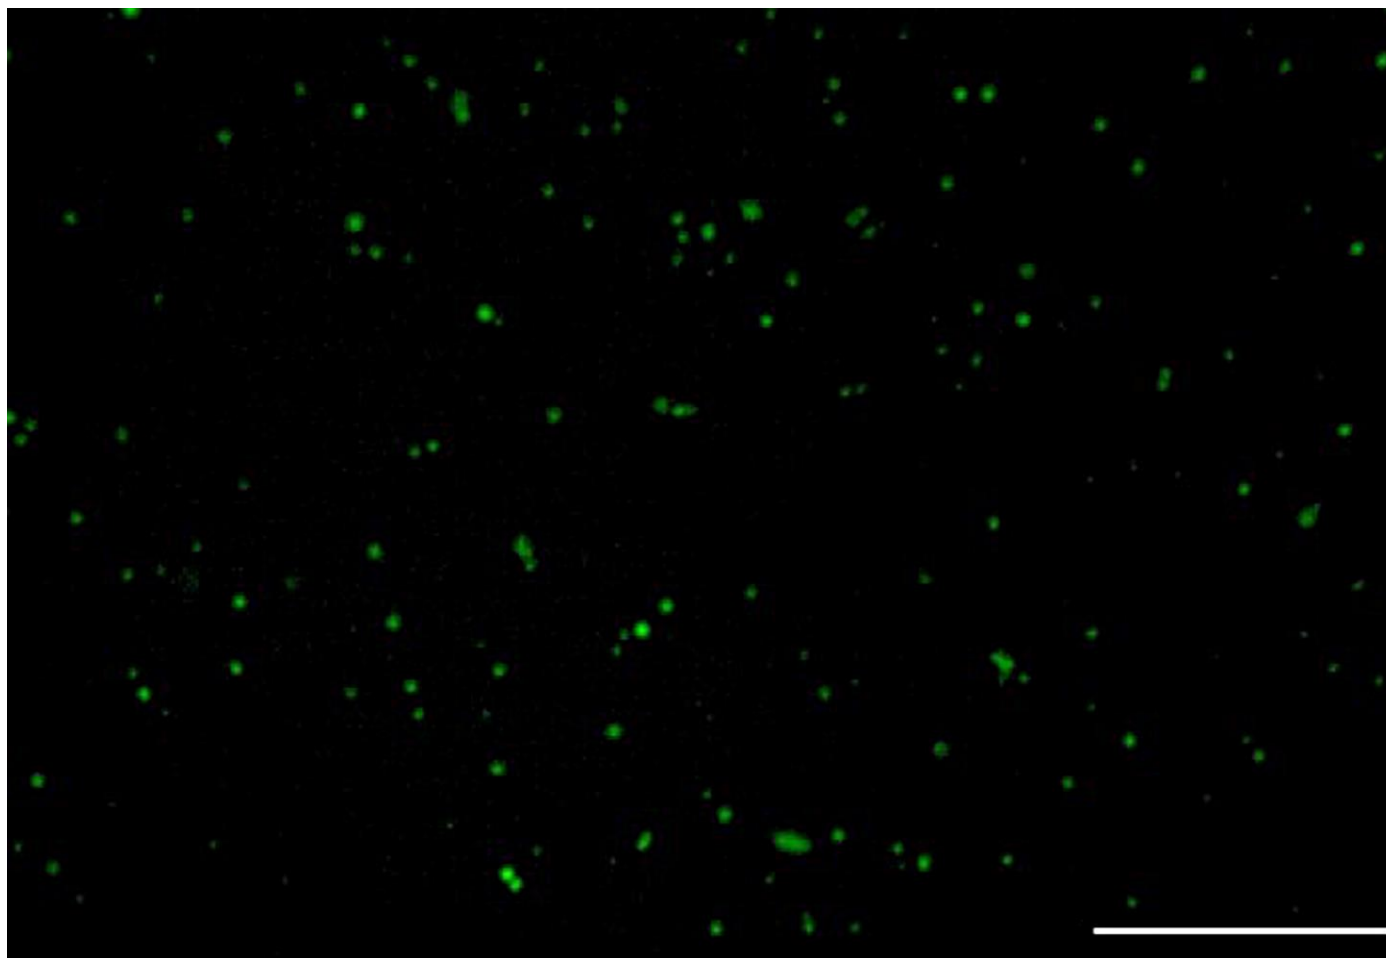

Supplement: Supplementary file 1 [file 12370307]
